# Supplementary material for: Ultrafast ion sieving using nanoporous polymeric membranes
Source: PubMed Central journal article supplement (PMC5805712; doi:10.1038/s41467-018-02941-6), 2018-02-08
Supplement: 41467_2018_2941_MOESM3_ESM.pdf [file 41467_2018_2941_MOESM3_ESM.pdf]

## Description of Additional Supplementary Files

### File Name: Supplementary Movie 1

**Description:** A 3 ns simulation of  $K^+$  ions passing through a polymer pore. The polymer is shown as transparent material; negatively charged residues ( $COO^-$ ) are shown in red (O) and cyan (C);  $K^+$  ions are shown in pink.  $Cl^-$  and water are not shown. During the simulation, a voltage bias of  $0.3 \text{ V nm}^{-1}$  is applied along the pore axis.

### File Name: Supplementary Movie 2

**Description:** A 3 ns simulation of  $Mg^{2+}$  ions passing through a polymer pore. The polymer is shown as transparent material; negatively charged residues ( $COO^-$ ) are shown in red (O) and cyan (C);  $Mg^{2+}$  ions are shown in blue.  $Cl^-$  and water are not shown. During the simulation, a voltage bias of  $0.3 \text{ V nm}^{-1}$  is applied along the pore axis.
